# Supplementary material for: Drug regimens identified and optimized by output-driven platform markedly reduce tuberculosis treatment time
Source: PubMed Central journal article supplement (PMC5287291; doi:10.1038/ncomms14183), 2017-01-24
Supplement: ncomms14183-s1.pdf [file ncomms14183-s1.pdf]

**Supplementary Table 1. Lung burden of *M. tuberculosis* in PRS Regimen I short-term efficacy study**

| Group | Treatment        | Drug            | Dose†   | Log <sub>10</sub> CFU (Mean ± s.e.m.) <sup>^</sup> |             |             |
|-------|------------------|-----------------|---------|----------------------------------------------------|-------------|-------------|
|       |                  |                 |         | Day 1                                              | Day 14      | Day 42      |
| A     | Sham             | None            |         | 2.22 ± 0.09                                        | 6.24 ± 0.05 | 6.67 ± 0.09 |
| B     | Standard Regimen | INH/RIF/EMB/PZA |         |                                                    |             | 4.24 ± 0.08 |
| C     | PRS Regimen I    | CLZ/EMB/PRO/PZA | H/L/L/H |                                                    |             | 2.88 ± 0.11 |
| D     | PRS Regimen I    | CLZ/EMB/PRO/PZA | H/L/H/L |                                                    |             | 3.83 ± 0.16 |
| E     | PRS Regimen I    | CLZ/EMB/PRO/PZA | H/H/L/L |                                                    |             | 3.64 ± 0.10 |
| F     | PRS Regimen I    | CLZ/EMB/PRO/PZA | H/H/H/H |                                                    |             | 2.45 ± 0.11 |
| G     | PRS Regimen I    | CLZ/EMB/PRO/PZA | H/H/H/L |                                                    |             | 3.97 ± 0.09 |
| H     | PRS Regimen I    | CLZ/EMB/PRO/PZA | H/H/L/H |                                                    |             | 2.77 ± 0.07 |
| I     | PRS Regimen I    | CLZ/EMB/PRO/PZA | H/L/H/H |                                                    |             | 2.69 ± 0.07 |
| J     | PRS Regimen I    | CLZ/EMB/PRO/PZA | H/H/M/M |                                                    |             | 3.60 ± 0.10 |
| K     | PRS Regimen I    | CLZ/EMB/PRO/PZA | H/M/H/M |                                                    |             | 3.78 ± 0.06 |
| L     | PRS Regimen I    | CLZ/EMB/PRO/PZA | H/M/M/H |                                                    |             | 2.80 ± 0.05 |

† Drug doses for the Standard Regimen and PRS Regimen II are shown in Table 1.

<sup>^</sup>Mice were infected with *M. tuberculosis* by aerosol at day 0, and to monitor bacterial growth during the pretreatment period, several mice were euthanized at day 1 and day 14 for determination of *M. tuberculosis* CFU counts in the lung. Starting at day 14, the mice were treated 5 days (Monday – Friday) per week for 4 weeks, and euthanized at day 42, 3 days after the last treatment dose, for determination of lung CFU counts.

**Supplementary Table 2. Lung burden of *M. tuberculosis* in the PRS Regimen II short-term efficacy study**

| Group | Treatment        | Drug            | Dose†   | Log <sub>10</sub> CFU (Mean ± s.e.m.)^§ |             |              |
|-------|------------------|-----------------|---------|-----------------------------------------|-------------|--------------|
|       |                  |                 |         | Day 1                                   | Day 14      | Day 42       |
| A     | Sham             | None            |         | 2.36 ± 0.11                             | 6.09 ± 0.04 | 6.71 ± 0.05  |
| B     | Standard Regimen | INH/RIF/EMB/PZA |         |                                         |             | 3.94 ± 0.03  |
| C     | PRS Regimen II   | CLZ/EMB/BDQ/PZA | H/L/L/H |                                         |             | 1.02 ± 0.12  |
| D     | PRS Regimen II   | CLZ/EMB/BDQ/PZA | H/L/H/L |                                         |             | 0.64 ± 0.12  |
| E     | PRS Regimen II   | CLZ/EMB/BDQ/PZA | H/H/L/L |                                         |             | 1.96 ± 0.09  |
| F     | PRS Regimen II   | CLZ/EMB/BDQ/PZA | H/H/H/H |                                         |             | 0.46 ± 0.01§ |
| G     | PRS Regimen II   | CLZ/EMB/BDQ/PZA | H/H/H/L |                                         |             | 0.47 ± 0.00§ |
| H     | PRS Regimen II   | CLZ/EMB/BDQ/PZA | H/H/L/H |                                         |             | 1.10 ± 0.19  |
| I     | PRS Regimen II   | CLZ/EMB/BDQ/PZA | H/L/H/H |                                         |             | 0.52 ± 0.06§ |
| J     | PRS Regimen II   | CLZ/EMB/BDQ/PZA | H/H/M/M |                                         |             | 0.47 ± 0.01§ |
| K     | PRS Regimen II   | CLZ/EMB/BDQ/PZA | H/M/H/M |                                         |             | 0.45 ± 0.01§ |
| L     | PRS Regimen II   | CLZ/EMB/BDQ/PZA | H/M/M/H |                                         |             | 0.54 ± 0.07  |

†Drug doses for Standard Regimen and PRS Regimen II are shown in table S1.

^Mice were infected with *M. tuberculosis* by aerosol at day 0, and to monitor bacterial growth during the pretreatment period, several mice were euthanized at day 1 and day 14 for determination of *M. tuberculosis* CFU counts in the lung. Starting at day 14, the mice were treated 5 days (Monday – Friday) per week for 4 weeks, and euthanized at day 42, 3 days after the last treatment dose, for determination of lung CFU counts.

§No *M. tuberculosis* CFU were detected on plates - data stated as discussed in methods

**Supplementary Table 3. Organ burden of *M. tuberculosis* in medium-term study**

a. Efficacy†

| Treatment Week | Sham        | Standard Regimen | Enhanced Standard Regimen | PRS Regimen I | PRS Regimen IIA | PRS Regimen IIB |
|----------------|-------------|------------------|---------------------------|---------------|-----------------|-----------------|
| -2             | 2.07 ± 0.08 |                  |                           |               |                 |                 |
| 0              | 6.04 ± 0.08 |                  |                           |               |                 |                 |
| 2              | 7.39 ± 0.16 | 4.79 ± 0.08      |                           |               | 3.02 ± 0.06     | 3.15 ± 0.08     |
| 3              | 7.12 ± 0.10 | 4.39 ± 0.13      | 4.18 ± 0.10               |               | 1.15 ± 0.06     | 0.89 ± 0.07     |
| 4              | 6.89 ± 0.05 | 3.85 ± 0.06      | 3.51 ± 0.02               | 2.54 ± 0.04   | 0.43 ± 0.06     |                 |
| 6              | 7.01 ± 0.08 | 2.97 ± 0.06      |                           | 0.94 ± 0.11   | 0.39 ± 0.02     |                 |
| 8              | 6.75 ± 0.12 | 1.58 ± 0.15      | 0.62 ± 0.12               | 0.37 ± 0.01   |                 |                 |

†Data shown are the mean ± s.e.m. Log<sub>10</sub> CFU of *M. tuberculosis* burden in the lung.

b. Relapse†

| Mouse <sup>^</sup> | Lung   |        |        | Spleen |        |        |
|--------------------|--------|--------|--------|--------|--------|--------|
|                    | 3 week | 4 week | 6 week | 3 week | 4 week | 6 week |
| 1                  | 3635   | 0      | 0      | 127    | 0      | 0      |
| 2                  | 9333   | 0      | 0      | 0      | 0      | 0      |
| 3                  | 1120   | 0      | 0      | 0      | 0      | 0      |
| 4                  | 0      | 0      | 0      | 0      | 0      | 0      |
| 5                  | 1      | 0      | 0      | 0      | 0      | 0      |
| 6                  | 0      | 0      |        | 0      | 0      |        |
| 7                  | 0      | 0      |        | 0      | 0      |        |
| 8                  | 0      |        |        | 0      |        |        |

†Data shown are *M. tuberculosis* CFU counts in the whole organ 3 months after completion of treatment with PRS Regimen IIA for the indicated duration.

<sup>^</sup>The number of mice included in the 3-, 4-, and 6-week relapse study was 8, 7, and 5, respectively.

**Supplementary Table 4. Lung burden of *M. tuberculosis* in long-term efficacy and relapse study**

a. Efficacy†

| Treatment Week | Sham                  | Standard Regimen                  | Enhanced Standard Regimen         | PRS Regimen I | PRS Regimen IIC | PRS Regimen IIC (daily)           |
|----------------|-----------------------|-----------------------------------|-----------------------------------|---------------|-----------------|-----------------------------------|
|                | Log <sub>10</sub> CFU | Log <sub>10</sub> CFU [Total CFU] | Log <sub>10</sub> CFU [Total CFU] | [Total CFU]   | [Total CFU]     | Log <sub>10</sub> CFU [Total CFU] |
| -2             | 2.30 ± 0.03           |                                   |                                   |               |                 |                                   |
| 0              | 5.68 ± 0.21           |                                   |                                   |               |                 |                                   |
| 2              |                       |                                   |                                   |               |                 | 1.70 ± 0.10                       |
| 3              | 7.06 ± 0.07           | 4.21 ± 0.06                       | 3.75 ± 0.07                       |               | [1.0 ± 0.4]     | [0.2 ± 0.2]                       |
| 4              | 7.04 ± 0.07           | 4.00 ± 0.03                       | 2.86 ± 0.08                       |               | [1.0 ± 0.4]     |                                   |
| 6              | 6.36 ± 0.07           | 2.87 ± 0.07                       | 1.44 ± 0.07                       |               | [0.4 ± 0.2]     |                                   |
| 8              | 6.75 ± 0.14           | 1.45 ± 0.05                       | [0.8 ± 0.2]                       | [0.0 ± 0.0]   |                 |                                   |
| 12             | 6.83 ± 0.09           | [0.2 ± 0.2]                       | [0.0 ± 0.0]*                      | [0.0 ± 0.0]‡  |                 |                                   |
| 16             | 7.09 ± 0.19           | [0.0 ± 0.0]                       | [0.0 ± 0.0]                       |               |                 |                                   |
| 20             | 7.03 ± 0.17           | [0.0 ± 0.0]                       | [0.0 ± 0.0]                       |               |                 |                                   |
| 24             | 7.05 ± 0.11           | [13.2 ± 13.2]                     | [0.0 ± 0.0]#                      |               |                 |                                   |

†Data shown are *M. tuberculosis* CFU counts in the entire organ, either as Log<sub>10</sub> CFU, or if in brackets, as Total CFU counts (Mean ± s.e.m.). Mice were treated starting two weeks after infection by oral gavage 5 days per week or, in the case of one group of mice on PRS Regimen IIC, daily as indicated in the last column.

\*15% of plates were contaminated with a fungus

# Represents data from 4 mice; 20% of plates were contaminated with a bacterium

‡Represents data from 4 mice; 46% of plates were contaminated with a fungus

b. Relapse for Standard Regimen treatment 5 days per week†

| Mouse | Lung     |          |          | Spleen   |          |          |
|-------|----------|----------|----------|----------|----------|----------|
|       | 12 weeks | 16 weeks | 20 weeks | 12 weeks | 16 weeks | 20 weeks |
| 1     | 0        | 0        | 0        | 0        | 0        | 0        |
| 2     | 0        | 0        | 0        | 0        | 0        | 0        |
| 3     | 0        | 0        | 0        | 0        | 0        | 0        |
| 4     | 0        | 0        | 0        | 0        | 0        | 0        |
| 5     | 323      | 0        | 0        | 0        | 0        | 0        |

†Data shown are total *M. tuberculosis* CFU counts for the whole organ 3 months after completion of treatment with the Standard Regimen for the indicated duration.

c. Relapse for Enhanced Standard Regimen treatment 5 days per week†

| Mouse | Lung     |          |          | Spleen   |          |          |
|-------|----------|----------|----------|----------|----------|----------|
|       | 12 weeks | 16 weeks | 20 weeks | 12 weeks | 16 weeks | 20 weeks |
| 1     | 0        | 0        | 0        | 0        | 0        | 0        |
| 2     | 0        | 0        | 0        | 0        | 0        | 0        |
| 3     | 0        | 0        | 0        | 0        | 0        | 0        |
| 4     | 0        | 0        | 0        | 0        | 0        | 0        |
| 5     | 0        | 0        | 0        | 0        | 0        | 0        |

†Data shown are *M. tuberculosis* CFU counts from the whole organ 3 months after completion of treatment with the Enhanced Standard Regimen for the indicated duration.

d. Relapse for PRS Regimen I treatment 5 days per week†

| Mouse | Lung    |          | Spleen  |          |
|-------|---------|----------|---------|----------|
|       | 8 weeks | 12 weeks | 8 weeks | 12 weeks |
| 1     | 0       | 0        | 0       | 0        |
| 2     | 0       | 0        | 0       | 0        |
| 3     | 0       | 0        | 0       | 0        |
| 4     | 0       | 0        | 0       | 0        |
| 5     | 453     | 0        | 0       | 0        |

†Data shown are *M. tuberculosis* CFU counts from the whole organ 3 months after completion of treatment with PRS Regimen I for the indicated duration.

e. Relapse for PRS Regimen IIC treatment 5 days per week†

| Mouse | Lung    |         |         | Spleen  |         |         |
|-------|---------|---------|---------|---------|---------|---------|
|       | 3 weeks | 4 weeks | 6 weeks | 3 weeks | 4 weeks | 6 weeks |
| 1     | 0       | 0       | 0       | 0       | 0       | 0       |
| 2     | 0       | 0       | 0       | 0       | 0       | 0       |
| 3     | 1164    | 0       | 0       | 0       | 0       | 0       |
| 4     | 0       | 0       | 0       | 0       | 0       | 0       |
| 5     | 0       | 0       | 47      | 0       | 0       | 0       |

†Data shown are *M. tuberculosis* CFU counts from the whole organ 3 months after completion of treatment with PRS Regimen IIC for the indicated duration.

f. Relapse for PRS Regimen IIC daily treatment†

| Mouse | Lung    |         | Spleen  |         |
|-------|---------|---------|---------|---------|
|       | 14 days | 21 days | 14 days | 21 days |
| 1     | 1568    | 0       | 6       | 0       |
| 2     | 140     | 0       | 0       | 0       |
| 3     | 1521    | 0       | 114     | 0       |
| 4     | 0       | 0       | 0       | 0       |
| 5     | 0       | 0       | 0       | 0       |

†Data shown are *M. tuberculosis* CFU counts from the whole organ 3 months after completion of treatment with PRS Regimen IIC for the indicated duration.
